# Supplementary material for: Small-colony variant of Staphylococcus lugdunensis in prosthetic joint infection
Source: PubMed Central journal article supplement — Arthroplast Today. 2018 Jul 30;4(3):257–60. doi: 10.1016/j.artd.2018.06.003 (PMC6123340; doi:10.1016/j.artd.2018.06.003), 2018-07-30
Supplement: mmc3.pdf [file mmc3.pdf]

# CONFLICT OF INTEREST STATEMENT

## *American Association of Hip and Knee Surgeons*

(Adopted from the American Academy of Orthopaedic Surgeons disclosure statement)

The following form **must be filled out completely and submitted by each author (example, 6 authors, 6 forms).**  
**All items require a response. If there is no relevant disclosure for a given item, enter "None."**

---

Manuscript Title

1. Royalties from a company or supplier (The following conflicts were disclosed) **none**
  
2. Speakers bureau/paid presentations for a company or supplier (The following conflicts were disclosed) **none**
  
- 3A. Paid employee for a company or supplier (The following conflicts were disclosed) **none**
  
- 3B. Paid consultant for a company or supplier (The following conflicts were disclosed) **none**
  
- 3C. Unpaid consultants for a company or supplier (The following conflicts were disclosed) **none**
  
4. Stock or stock options in a company or supplier (The following conflicts were disclosed) **none**
  
5. Research support from a company or supplier as a Principal Investigator (The following conflicts were disclosed) **none**
  
6. Other financial or material support from a company or supplier (The following conflicts were disclosed) **none**
  
7. Royalties, financial or material support from publishers (The following conflicts were disclosed) **none**
  
8. Medical/Orthopaedic publications editorial/governing board (The following conflicts were disclosed) **none**
  
9. Board member/committee appointments for a society (The following conflicts were disclosed) **none**

**Each author must sign AND print or type his/her name, date and submit a separate form**

In addition, one BLINDED Conflict of Interest form (no author names used) should be submitted per manuscript with all author disclosures.

Mohamed Askar



29<sup>th</sup>, Jan., 2018

---

Author Name (Print or Type)

Author Signature

Date
